# Supplementary material
Source: PubMed Central journal article supplement (PMC5597469)
Supplement: NIHMS881998-supplement-Supplemental_Digital_Content.pdf [file NIHMS881998-supplement-Supplemental_Digital_Content.pdf]

**Supplementary Figure 1.** Depiction of a grid search to identify the optimal timing of “early” successful outreach efforts, locating a cut-point based on the number of days from flagging a patient as lost to clinic to successful outreach that achieved the smallest Akaike Information Criterion (AIC) value (Y-axis values). All times from 1 day to 100 days until the outcome of successful outreach were evaluated.

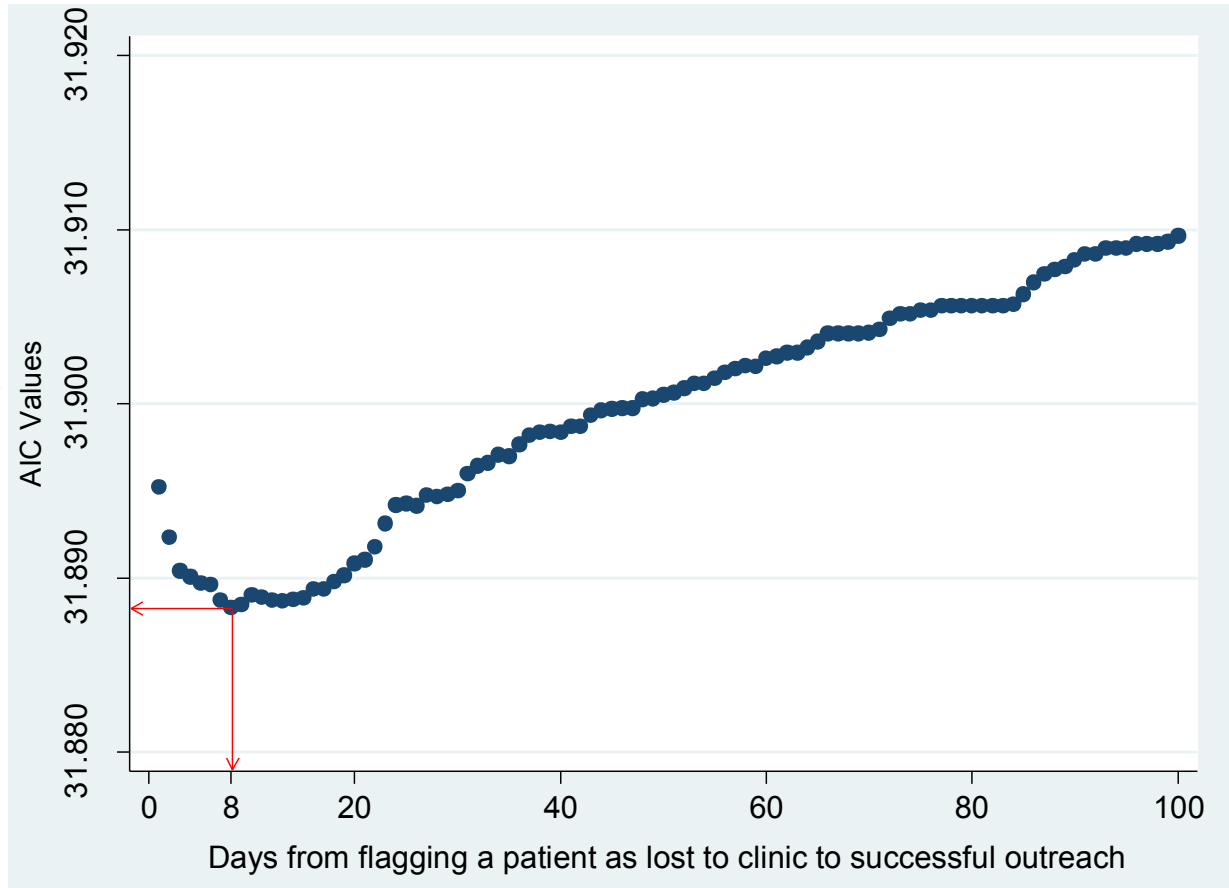

**Supplementary Table 1.** Effect of early outreach on the hazard of returning to care. Results from a naïve complete-case analysis among N=24,093 individuals included in a multivariable Cox proportional hazards model, excluding N=6,838 lost patients with missing vital status (or equivalently missing true gap in care status).

|                                                | <b>HR</b> | <b>95% CI</b>  | <b>p-value</b> |
|------------------------------------------------|-----------|----------------|----------------|
| <b>Age at beginning of gap in care (years)</b> |           |                |                |
| <i>18-24.9</i>                                 | 1         |                |                |
| <i>25-34.9</i>                                 | 1.145     | (1.076, 1.218) | <0.001         |
| <i>35-44.9</i>                                 | 1.262     | (1.184, 1.346) | <0.001         |
| <i>45+</i>                                     | 1.361     | (1.272, 1.456) | <0.001         |
| <b>Gender</b>                                  |           |                |                |
| <i>Male</i>                                    | 1         |                |                |
| <i>Female &amp; non-pregnant</i>               | 1.055     | (1.020, 1.092) | 0.002          |
| <i>Female &amp; pregnant</i>                   | 1.132     | (1.060, 1.210) | <0.001         |
| <b>Successful outreach within 8 days</b>       |           |                |                |
| <i>No</i>                                      | 1         |                |                |
| <i>Yes</i>                                     | 1.089     | (1.056, 1.122) | <0.001         |
| <b>On ART</b>                                  |           |                |                |
| <i>No</i>                                      | 1         |                |                |
| <i>Yes</i>                                     | 1.500     | (1.444, 1.557) | <0.001         |
| <b>HIV status disclosed</b>                    |           |                |                |
| <i>No</i>                                      | 1         |                |                |
| <i>Yes</i>                                     | 1.025     | (0.993, 1.058) | 0.132          |
| <b>Initial CD4</b>                             |           |                |                |
| <i>&lt;350</i>                                 | 1         |                |                |
| <i>350+</i>                                    | 0.959     | (0.923, 0.997) | 0.034          |
| <b>WHO stage 3/4</b>                           |           |                |                |
| <i>1/2</i>                                     | 1         |                |                |
| <i>3/4</i>                                     | 1.018     | (0.985, 1.052) | 0.296          |
| <b>Travel time to clinic</b>                   |           |                |                |
| <i>0'-60'</i>                                  | 1         |                |                |
| <i>&gt;60'</i>                                 | 0.988     | (0.957, 1.020) | 0.450          |
